# Supplementary material
Source: Springer Nature journal article supplement (https://www.springermedizin.de/resource/supplementary/13058_2013_3273_MOESM1_ESM.pdf/9703704)

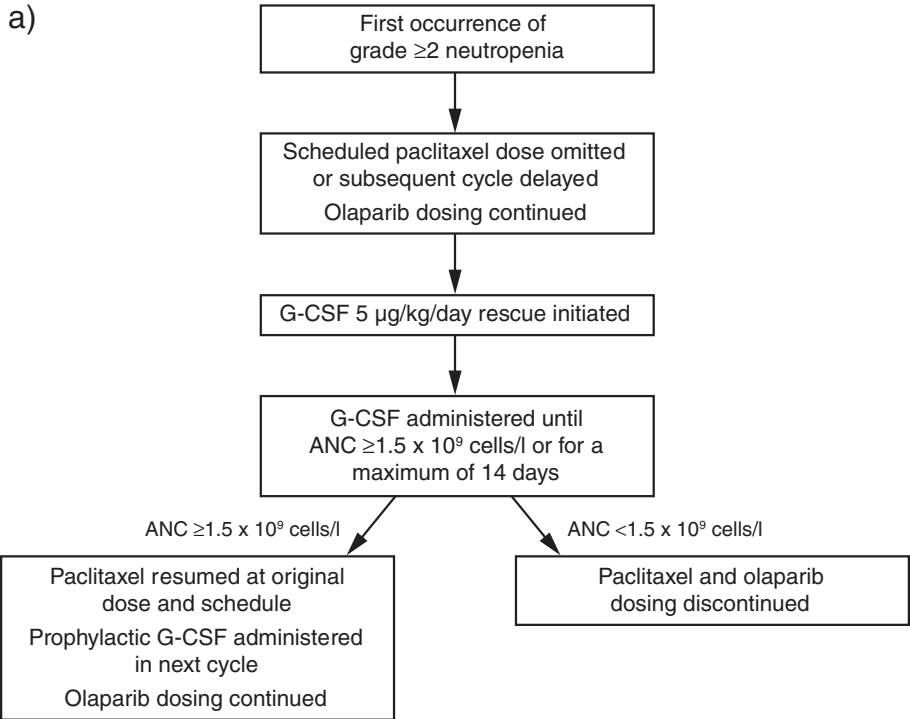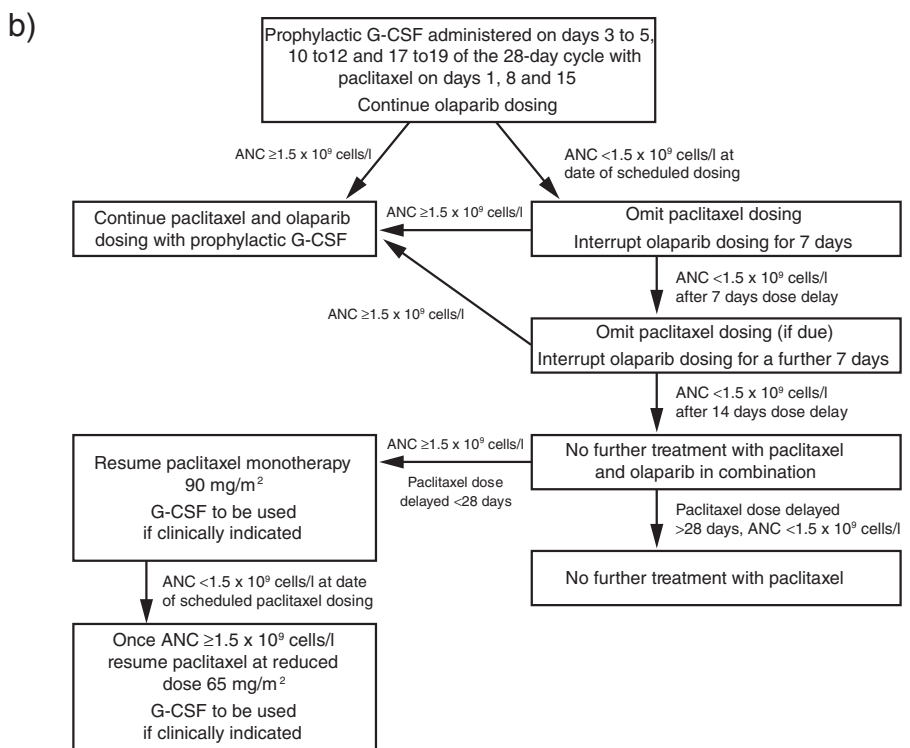

*G-CSF, granulocyte colony-stimulating factor; ANC, absolute neutrophil count*

Supplement: MOESM1 [file 9703704]
